# Supplementary material for: Intense broadband radioluminescence from an Mn2+-doped aluminoborate glass scintillator
Source: Royal Society of Chemistry journal article supplement (doi:10.1039/d2tc01968j), 2022-01-01
Supplement: d2tc01968j1.pdf [file d2tc01968j1.pdf]

Supporting Information for

## **Intense broadband radioluminescence from Mn<sup>2+</sup>-doped aluminoborate glass scintillator**

SunYueZi Chen<sup>a</sup>, YuJia Gong<sup>a</sup>, WenJun Huang<sup>a</sup>, ZhuoXing Wen<sup>a</sup>, Lianjie Li<sup>a</sup>,  
Ghulam Abbas Ashraf<sup>a</sup>, Lei Lei<sup>a,b\*</sup>, JiangKun Cao<sup>a,c\*</sup>, Hai Guo<sup>a\*</sup>

<sup>a</sup>Department of Physics, Zhejiang Normal University, Jinhua, Zhejiang, 321004, China

<sup>b</sup>College of Optical and Electronic technology, China Jiliang University, Hangzhou, 310018,  
China

<sup>c</sup>Otto Schott Institute of Materials Research, Friedrich Schiller University Jena,  
Fraunhoferstrasse 6, 07743 Jena, Germany

---

**\*Corresponding author:**

Lei Lei, E-mail: [leilei@cjlu.edu.cn](mailto:leilei@cjlu.edu.cn)

Jiangkun Cao, E-mail: [jiangkun.cao@uni-jena.de](mailto:jiangkun.cao@uni-jena.de)

Hai Guo, E-mail: [ghh@zjnu.cn](mailto:ghh@zjnu.cn)

### Calculation of effective atomic number of glass samples

The  $Z_{\text{eff}}$  value is estimated by using the well-known empirical equation,<sup>1</sup>

$$Z_{\text{eff}} = \sqrt[2.94]{f_1(Z_1)^{2.94} + f_2(Z_2)^{2.94} + f_3(Z_3)^{2.94} + \dots + f_i(Z_i)^{2.94}} \quad (\text{S1})$$

where  $f_i$  is fraction of total number of electrons associated with each element, and  $Z_i$  is atomic number of each element. The  $Z_{\text{eff}}$  result of AM0.9 specimen is 48.31.

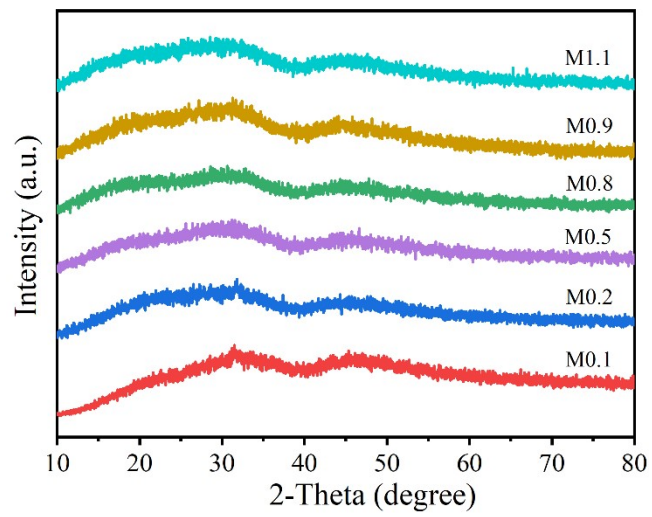

Fig. S1 XRD patterns of all Mx samples.

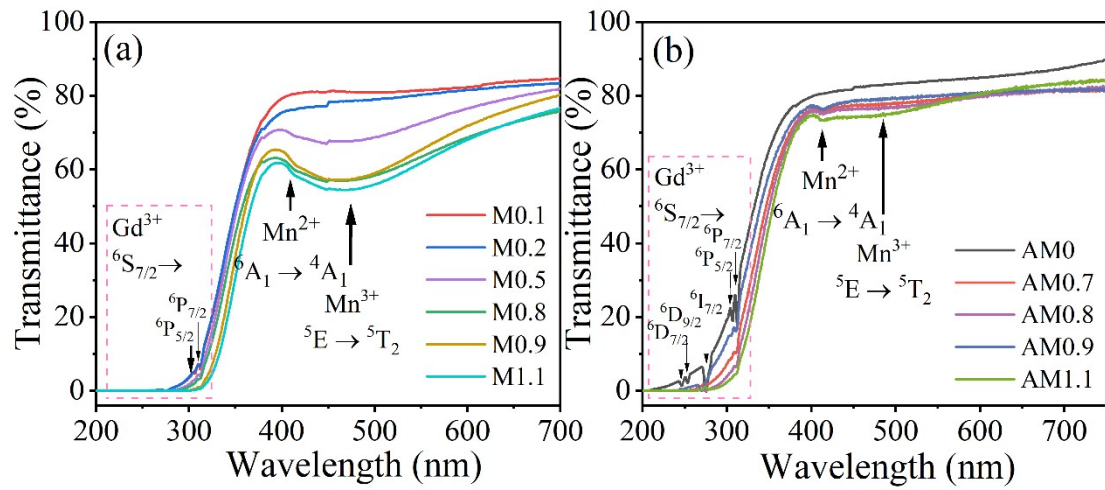

Fig. S2 Transmittance spectra of (a) M<sub>x</sub> samples and (b) AM<sub>x</sub> samples.

### The valance variation of Mn<sup>3+</sup> to Mn<sup>2+</sup>

The binding energy of Mn<sup>2+</sup> is around 641.0 eV (green line).<sup>2</sup> The binding energy of Mn<sup>3+</sup> is around 641.6 eV (magenta line).<sup>2</sup> The content of Mn<sup>2+</sup> is increased from 25.0 % (in M0.9 sample) to 92.2 % (in AM0.9 sample), which illustrates the splendid reduction of Mn<sup>3+</sup> to Mn<sup>2+</sup> with the addition of Al. The detailed area information is listed in Table S1.

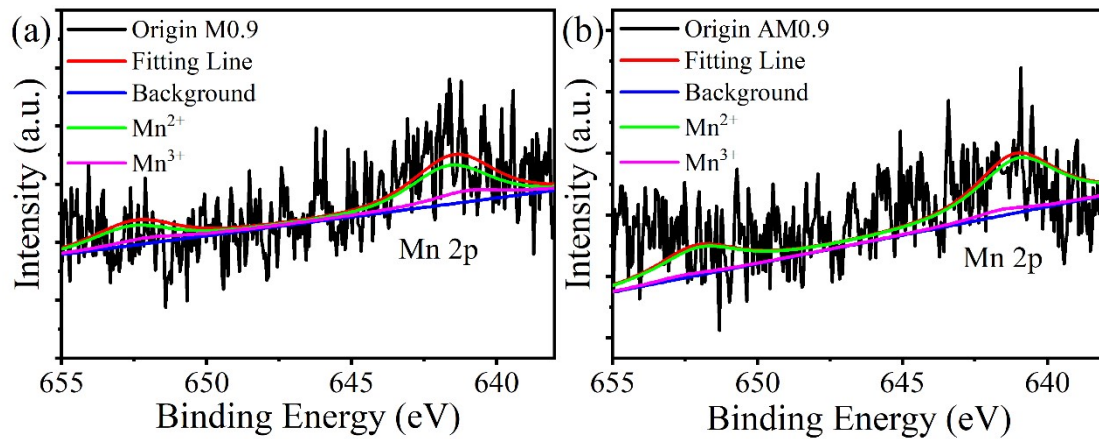

Fig. S3 XPS spectra of Mn 2p level of (a) M0.9 sample, (b) AM0.9 sample.

### The complete transformation of Al metal into Al<sup>3+</sup>

The binding energy of Al<sup>3+</sup> is around 74.3 eV.<sup>3</sup> And the binding energy of Al metal is around 72 eV.<sup>3</sup> The fitting line can only be fitted by Al<sup>3+</sup>, indicating all the Al metal is oxidized into Al<sup>3+</sup>.

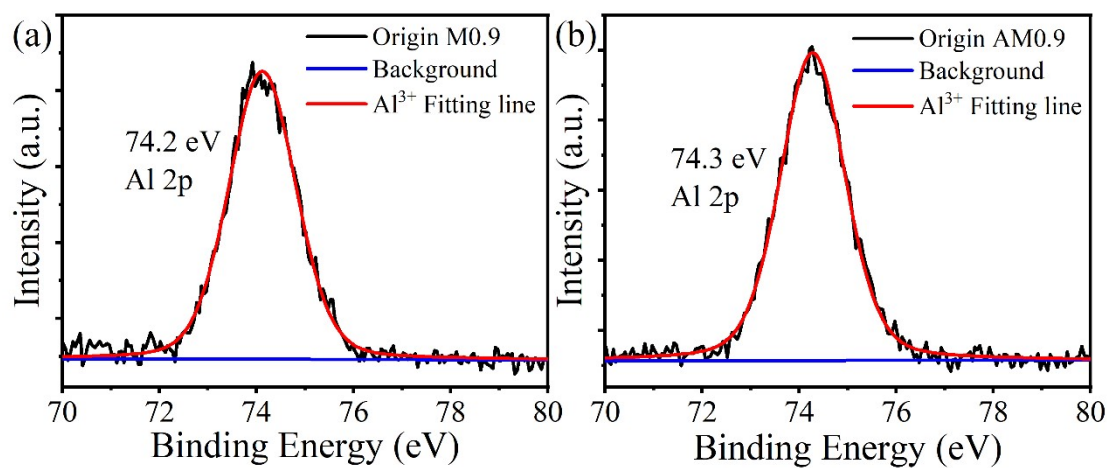

Fig. S4 XPS spectra of Al 2p level of (a) M0.9 sample, (b) AM0.9 sample.

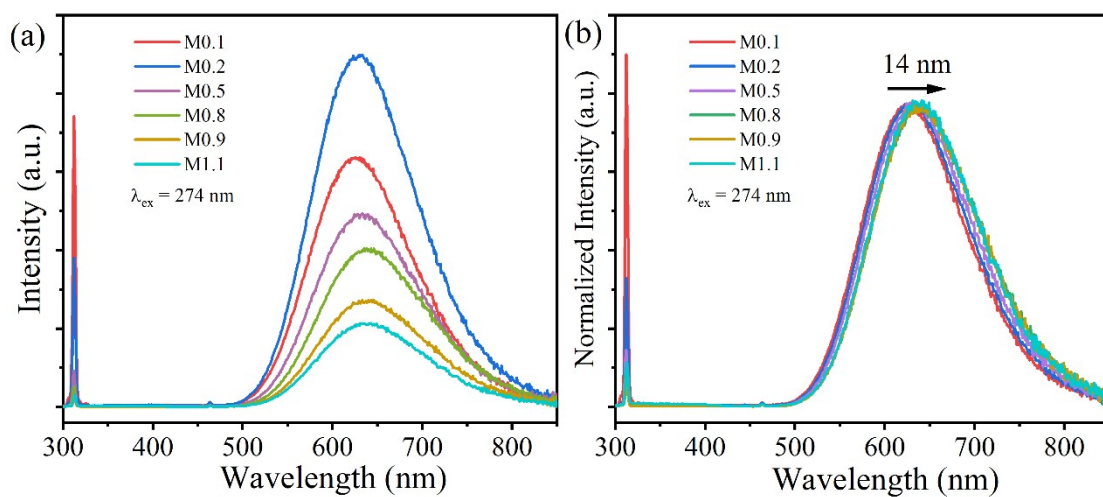

Fig. S5 (a) PL spectra ( $\lambda_{\text{ex}} = 274 \text{ nm}$ ), (b) the normalized PL spectra ( $\lambda_{\text{ex}} = 274 \text{ nm}$ ) of M<sub>x</sub> specimens.

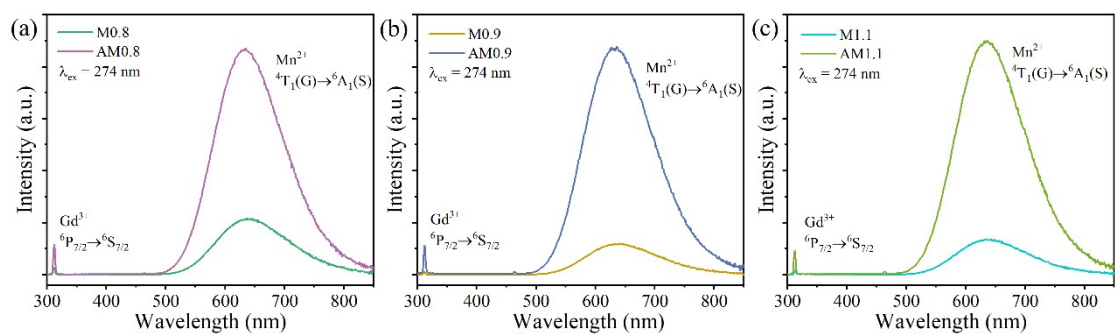

Fig. S6 PLE spectra ( $\lambda_{\text{ex}} = 274 \text{ nm}$ ) of (a) M0.8 and AM0.8, (b) M0.9 and AM0.9, (c) M1.1 and AM1.1.



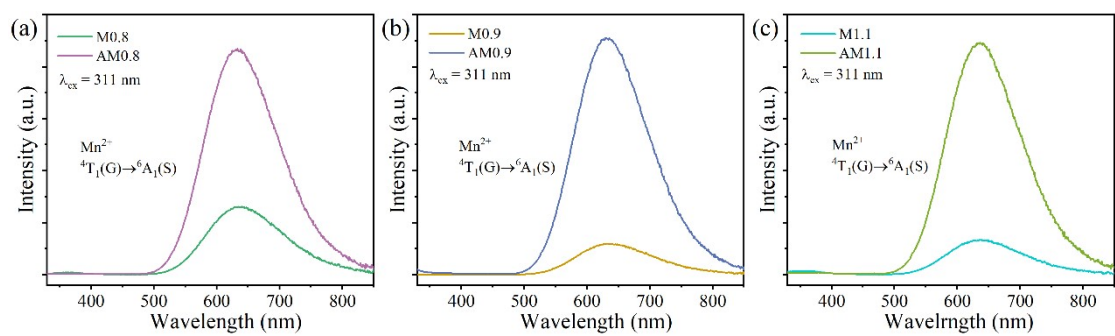

Fig. S7 PLE spectra ( $\lambda_{\text{ex}} = 311 \text{ nm}$ ) of (a) M0.8 and AM0.8, (b) M0.9 and AM0.9, (c) M1.1 and AM1.1.

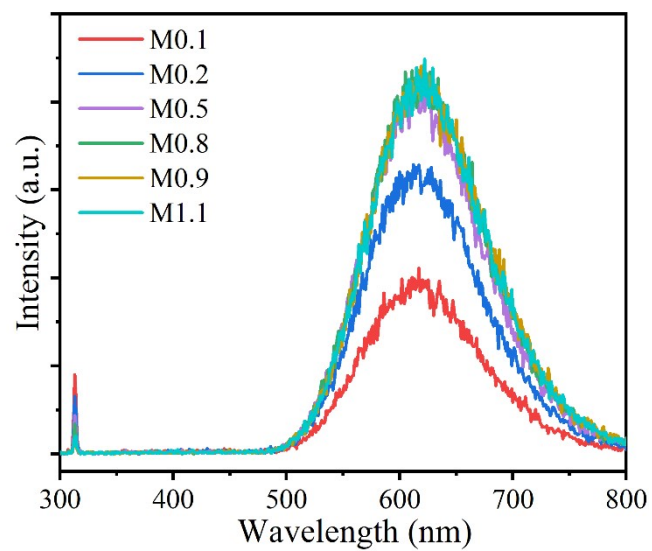

Fig. S8 XEL spectra of all Mx specimens.

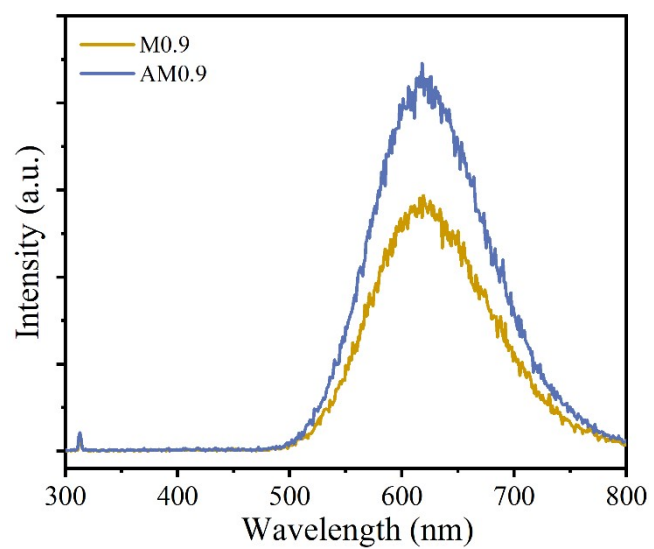

Fig. S9 XEL spectra of AM0.9 and M0.9 specimens.

### The radiation tolerance of AM0.9 sample

The optimal AM0.9 specimen was radiated continuously under 7 W X-ray for one hour. The XEL spectra were obtained for every 5 min to show the stability of the specimen.

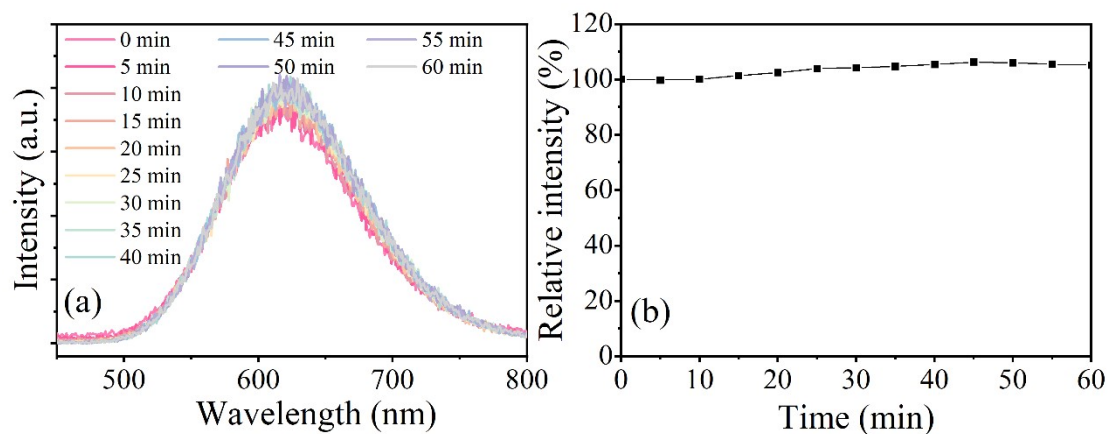

Fig. S10 (a) The XEL spectra measured at different time when the AM0.9 specimen was radiated continuously under 7 W X-ray for one hour; (b) time dependent integrated XEL intensities of AM0.9 specimen.

Table S1 The area of Mn<sup>2+</sup> and Mn<sup>3+</sup> from XPS results.

| Valance of Mn    | Binding Energy (eV) | Area in M0.9<br>sample/Ratio (%) | Area in AM0.9<br>sample/Ratio (%) |
|------------------|---------------------|----------------------------------|-----------------------------------|
| Mn <sup>2+</sup> | 641.0               | 106.4576/25.0                    | 496.9508/92.2                     |
| Mn <sup>3+</sup> | 641.6               | 319.3078/75.0                    | 42.1270/7.8                       |

Table S2 IQY values of Mx specimens excited by 274 nm.

| Samples | M0.1   | M0.2   | M0.5   | M0.8  | M0.9  | M1.1  |
|---------|--------|--------|--------|-------|-------|-------|
| IQY     | 18.0 % | 18.1 % | 14.0 % | 6.8 % | 3.4 % | 0.5 % |

**Reference:**

- [1] M. P. Singh, B. S. Sandhh, B. Singh, Nucl. Instrum. Meth. A, 2007, **580**, 50-53.
- [2] R. J. Iwanowski, M. H. Heinonen, E. Janik, Chem. Phys. Lett., 2004, **387**, 110-115.
- [3] T. Cheng, Z. Wang, S. Jin, F. Wang, Y. Bai, H. Feng, B. You, Y. Li, T. Hayat, Z. Tan, Adv. Opt. Mater., 2017, **5**, 1700035.
